# Supplementary material
Source: publisher figshare collection journal article supplement (https://frontiersin.figshare.com/ndownloader/files/24560000)
Supplement: Supplementary file [file 24560000]

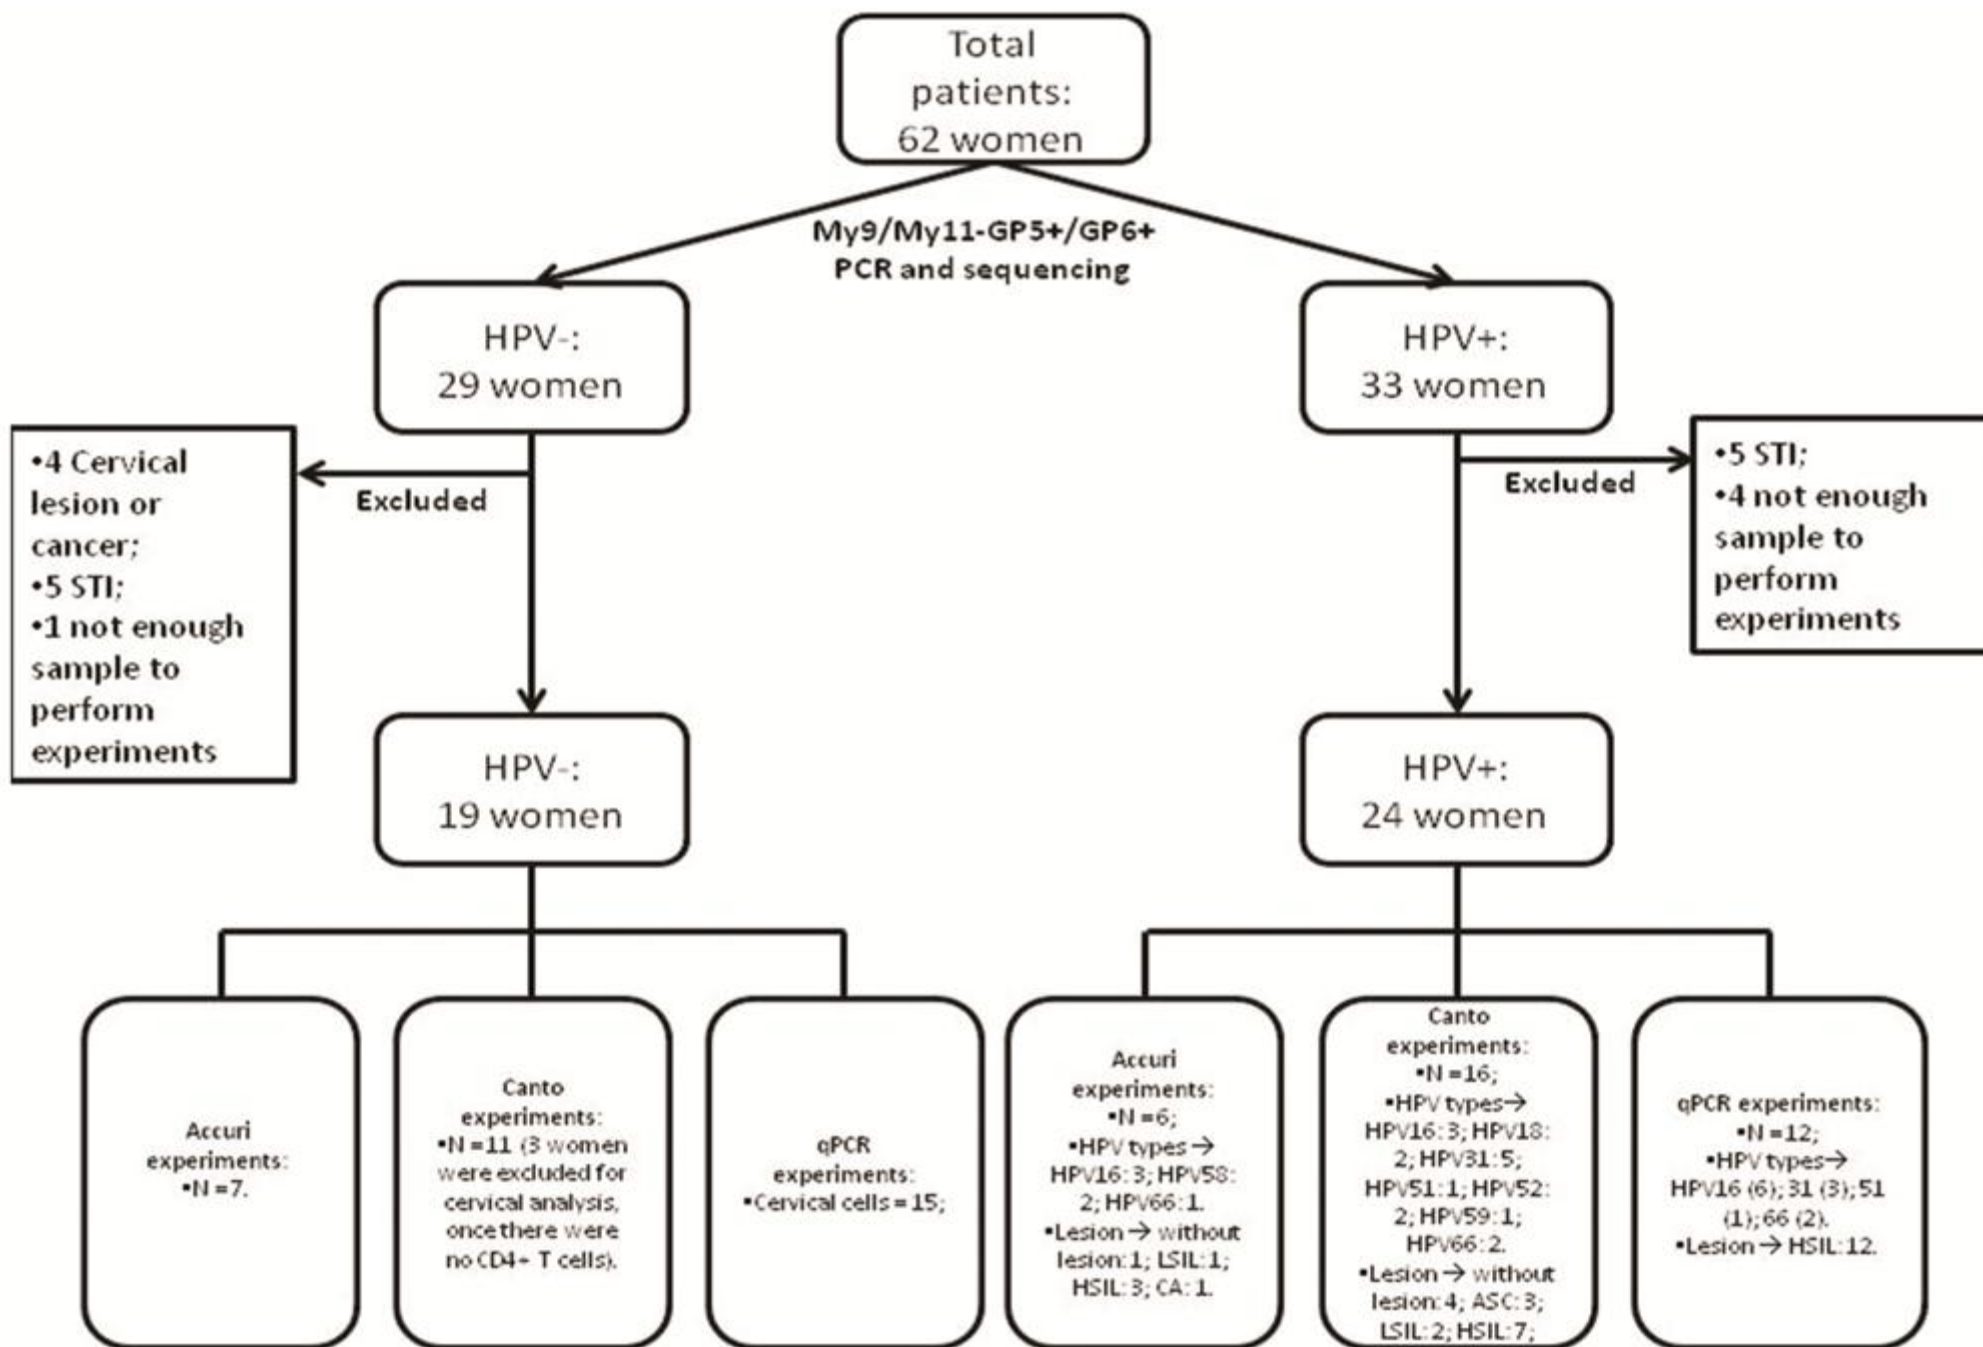

**Supplementary Figure 1. Flow diagram of patients' selection criteria.** STI: sexually transmitted infection; HPV types: classification based on sequencing of My9/My11 and GP5+/GP6+ PCR product; Lesion: based on cytology; ASC – atypical squamous cells; LSIL – low grade squamous intraepithelial lesion; HSIL – high grade squamous intraepithelial lesion; CA – cervical cancer; Accuri experiments: patients information of experiments that were carried out using BD Accuri C6 as flow cytometer; Canto experiments: patients information of experiments that were carried out using FACSCanto II as flow cytometer; qPCR experiments: patients information of qPCR experiments.
